# Supplementary material
Source: PubMed Central journal article supplement (PMC3992577)

A

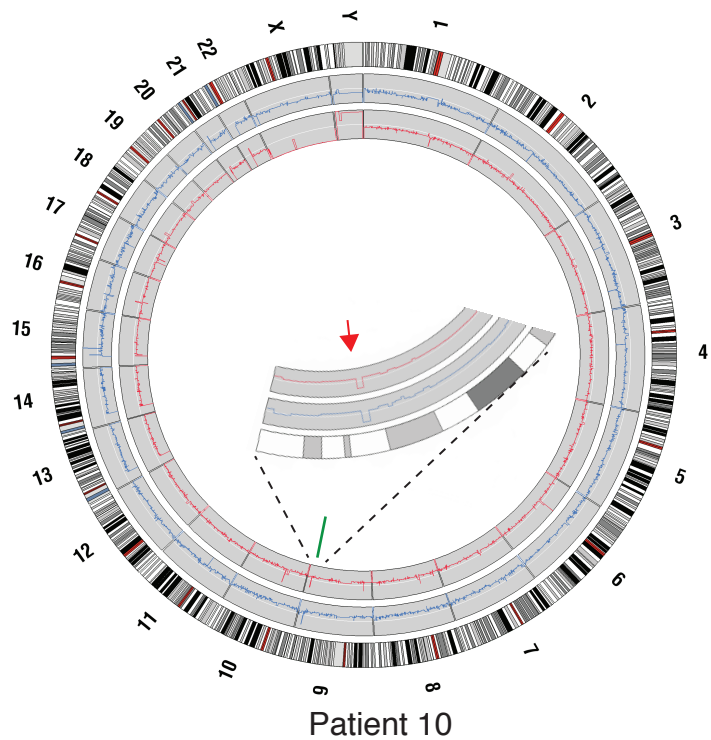

B

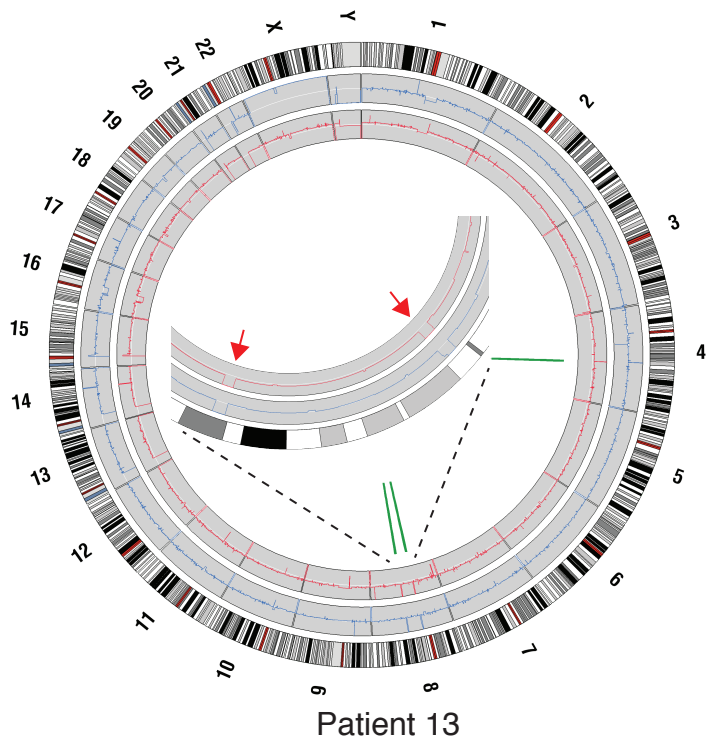

Supplement: ejhg2013220x3.pdf [file ejhg2013220x3.pdf]

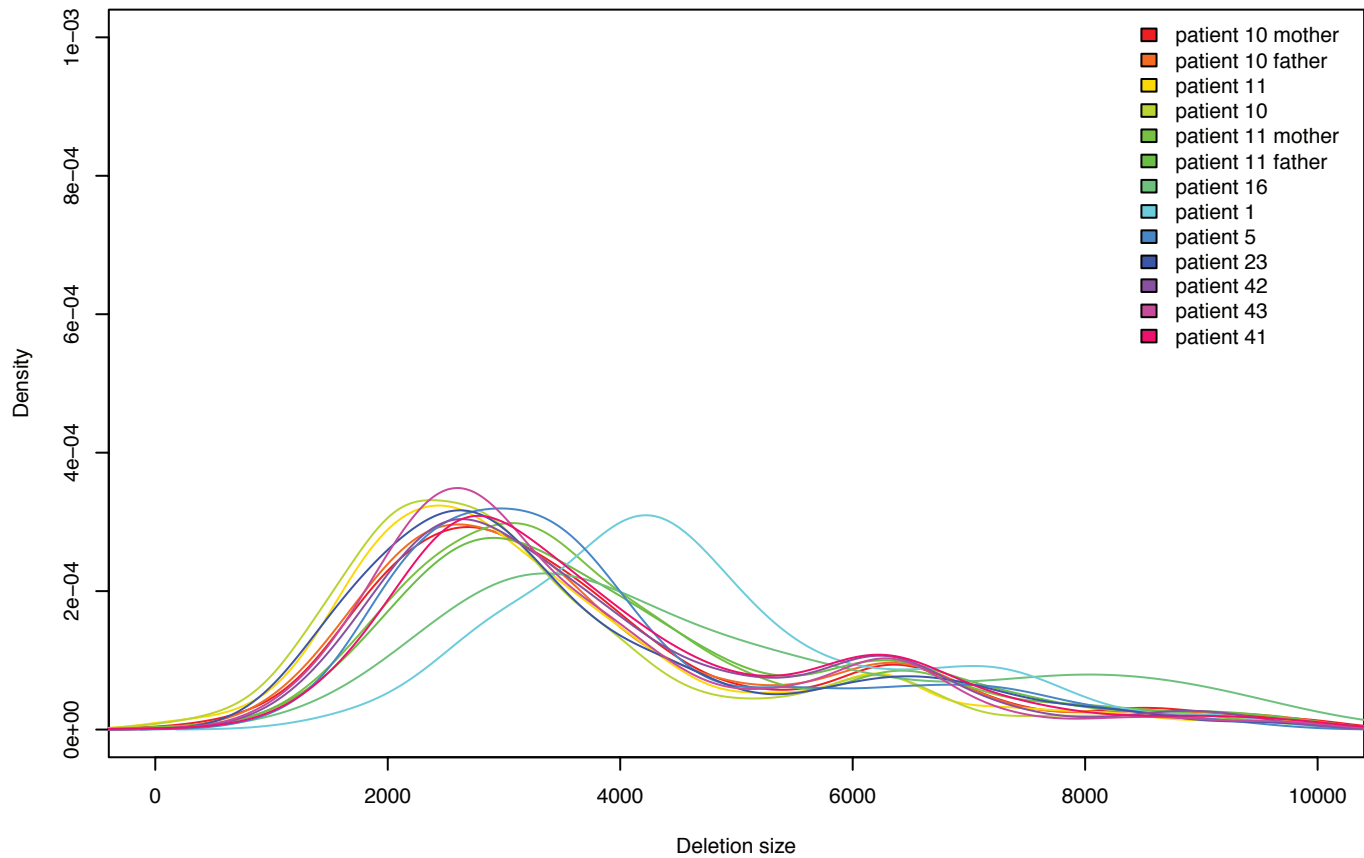

Supplement: ejhg2013220x5.pdf [file ejhg2013220x5.pdf]
